# Supplementary material
Source: publisher site journal article supplement (https://www.spandidos-publications.com/2994/downloadSupplementary)
Supplement: Supplementary file 1 [file downloadSupplementary]

Table SI. Univariate Cox regression for survival analysis according to histological and molecular cancer subtypes.

| Localisation | Subtypes              | Overall survival (months) |             | Univariate COX regression |             |
|--------------|-----------------------|---------------------------|-------------|---------------------------|-------------|
|              |                       | median                    | [95% CI]    | HR                        | [95% CI]    |
| Lung         | Genetic mutations     |                           |             |                           |             |
|              | No                    | 14                        | [10.6-17.4] | 0.8                       | [0.49-1.29] |
|              | Yes <sup>a</sup>      | 12                        | [2.8-21.2]  |                           |             |
|              | Histological subtype  |                           |             |                           |             |
|              | Sclc                  | 25                        | [0-51.9]    | 0.41                      | [0.17-1.03] |
|              | Adenocarcinoma        | 16                        | [13.2-18.8] | 0.53                      | [0.27-1.04] |
| Breast       | Squamous <sup>a</sup> | 7                         | [5.5-8.5]   |                           |             |
|              | Genetic subtype       |                           |             |                           |             |
|              | 3neg <sup>a</sup>     | 20                        | [2.7-37.3]  |                           |             |
|              | HR+/HER2+             | 35                        | [33.6-36.4] | 0.7                       | [0.27-1.80] |
|              | HR-/HER2+             | 23                        | [20.4-25.6] | 0.82                      | [0.29-2.33] |
|              | HR+/HER2-             | 27                        | [1-53.3]    | 0.99                      | [0.37-2.62] |

Data are presented as median and 95% confidence interval (CI) survival time expressed in months. <sup>a</sup>Reference for calculating the hazard ratio in the univariable analysis. HER2, human epidermal growth factor receptor 2 protein positive breast cancers; HR, hormone receptors; sclc, small cells lung cancer; 3neg, triple negative breast cancer. Genetic mutations considered for lung cancers include: ALK/ROS-a/KRAS/EGFR positive lung cancers.

Table SII. Univariate and multivariate Cox regression for survival analysis. dPT group includes patients with at least 30 months of progression-free survival, before BM diagnosis, under no systemic treatment.

| Parameters                  | Overall survival (months) |             | Univariate COX regression |              | Multivariate Cox regression |             | P-value      |
|-----------------------------|---------------------------|-------------|---------------------------|--------------|-----------------------------|-------------|--------------|
|                             | Median                    | [95% CI]    | HR                        | [95% CI]     | HR                          | [95% CI]    |              |
| Age BM                      | NA                        | NA          | 1.02                      | [1.01-1.03]  | 1.02                        | [1.00-1.03] | <b>0.025</b> |
| BM treatment                |                           |             |                           |              |                             |             |              |
| Surgery + Rtp               | 17                        | [13.9-20.1] | 0.5                       | [0.28-0.88]  | 0.55                        | [0.31-0.97] | <b>0.037</b> |
| Rtp or Surgery <sup>a</sup> | 8                         | [2.7-13.3]  |                           |              | NA                          | NA          | NA           |
| PT localization             |                           |             |                           |              |                             |             |              |
| Breast                      | 34                        | [24.1-43.9] | 0.64                      | [0.41-0.99]  | 0.74                        | [0.49-1.09] | 0.132        |
| Lung                        | 14                        | [10.7-17.3] | 1.02                      | [0.72-1.143] | NA                          | NA          | NA           |
| Other <sup>a</sup>          | 17                        | [11.4-22.6] |                           |              | NA                          | NA          | NA           |
| dPT                         |                           |             |                           |              |                             |             |              |
| Yes                         | 34                        | [21.3-46.7] | 0.49                      | [0.24-0.99]  | 0.51                        | [0.25-1.05] | 0.067        |
| No <sup>a</sup>             | 16                        | [12.9-19.0] |                           |              |                             |             |              |

Data are presented as median and 95% confidence interval (CI) survival time expressed in months. <sup>a</sup>Reference for calculating the hazard ratio in the univariable analysis. BM, brain metastases; dPT, includes patients with at least 30 months of progression-free survival, before BM diagnosis, under no systemic treatment; NA, not applicable; PT, primary tumor; Rtp, radiotherapy. Multivariable Cox regression significant P-values (i.e. <0.05) are bold.
